# Supplementary material for: Retracted Article: Morphological evolution of polyaniline and its interaction with amphiphiles
Source: Royal Society of Chemistry journal article supplement (doi:10.1039/c3ra42063a), 2013-06-05
Supplement: c3ra42063a.pdf [file c3ra42063a.pdf]

## Supplementary Information

# Morphological evolution of polyaniline and its interaction with amphiphiles

Kingshuk Dutta<sup>\*</sup> and Patit P. Kundu<sup>\*</sup>

Advanced Polymer Laboratory, Department of Polymer Science and Technology, University of  
Calcutta, 92, A. P. C. Road, Kolkata – 700009, India.

## FIGURES

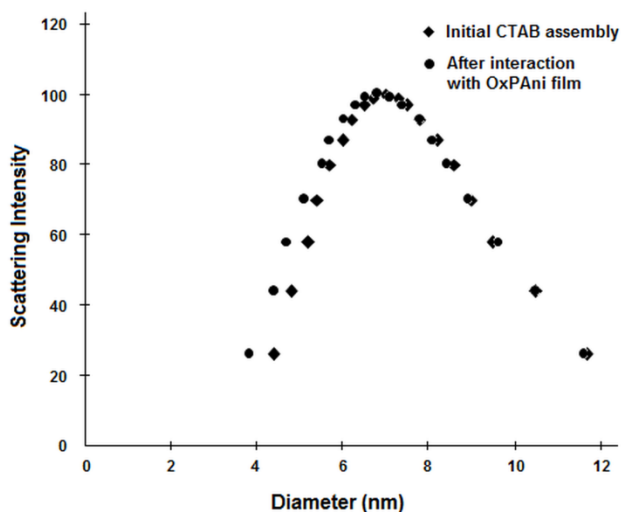

**Fig. S1** DLS data representing the unchanged scattering intensity plots between initial CTAB AAs and that after interaction with OxPAni film.

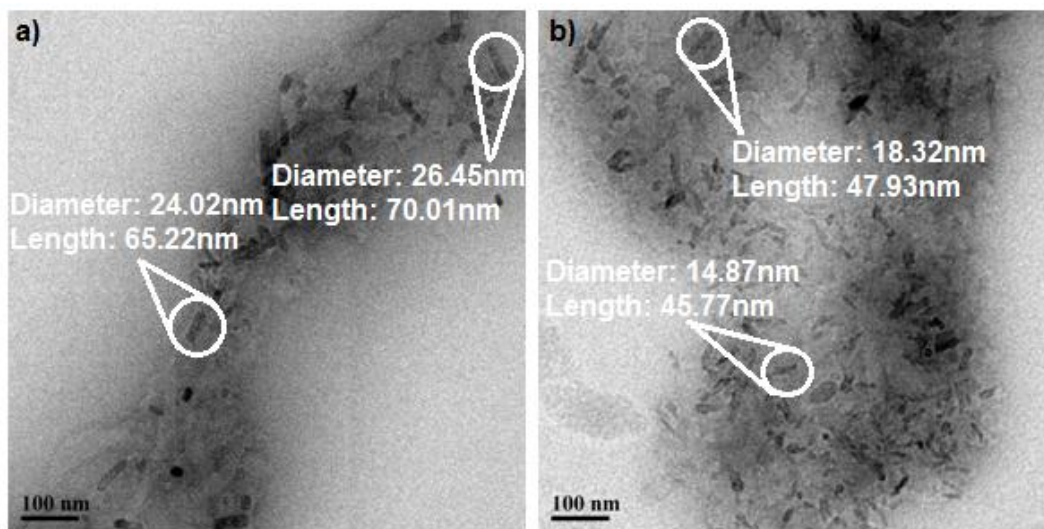

**Fig. S2** Transmission electron micrographs of OxPAni nanofibers after (a) 50 minutes and (b) 70 minutes exposure to DBSA. Results comparable to SDS were obtained.
